# Supplementary material for: The Influence of Minimal Cultivation Techniques on Growth Rate of Robinia pseudacacia L. Seedlings
Source: MDPI journal article supplement (doi:10.3390/f15050785), 2024-04-29
Supplement: s1 [file s1]

## Supplimentary fiels

### *Germination and survival*

The seedling emergence rate for organic substrate treatments ranged from 9% to more than 45% on the 7<sup>th</sup> day after sowing. The seedling emergence rate for mineral substrate treatments ranged from 6% to more than 20% on the 7<sup>th</sup> day after sowing (Table S1). After 21 days, the seedling emergence rate became unchanged for all treatments, showing a range around 70% for organic substrate MKS 1, higher than MKS 3, this ranged from 50% to almost 59%. The seedling emergence rate for mineral substrate treatments ranged from 51% to more than 70% on the 21<sup>st</sup> day after sowing.

**Table S1.** The seedling emergence rate (%) for seed source of provenance and substrate treatments.

| Day after sowing | Treatment  | Organic substrate |      |      | Mineral substrate |      |      |      |      |      |
|------------------|------------|-------------------|------|------|-------------------|------|------|------|------|------|
|                  |            | B1                | B2   | B3   | B4                | B5   | B6   | B7   | B8   |      |
| 7 <sup>th</sup>  | Provenance | A1                | 37.2 | 9.5  | 11.1              | 18.1 | 8.2  | 19.8 | 9.5  | 11.7 |
| 14 <sup>th</sup> |            |                   | 48.6 | 45.7 | 45.7              | 43.2 | 46.3 | 50.2 | 44.4 | 47.9 |
| 21 <sup>st</sup> |            |                   | 70.2 | 50.8 | 60.1              | 53.3 | 60.1 | 59.3 | 54.9 | 57.6 |
| 7 <sup>th</sup>  |            | A2                | 47.1 | 24.7 | 11.9              | 10.1 | 7.2  | 20.6 | 6.8  | 7.4  |
| 14 <sup>th</sup> |            |                   | 63.6 | 52.7 | 52.5              | 54.1 | 57.2 | 66.5 | 52.9 | 61.5 |
| 21 <sup>st</sup> |            |                   | 73.7 | 56.4 | 63.0              | 54.3 | 66.0 | 70.8 | 67.1 | 62.8 |
| 7 <sup>th</sup>  |            | A3                | 25.7 | 31.1 | 14.0              | 6.0  | 11.1 | 20.6 | 6.8  | 8.0  |
| 14 <sup>th</sup> |            |                   | 43.4 | 56.0 | 47.9              | 39.7 | 50.2 | 54.5 | 38.1 | 42.8 |
| 21 <sup>st</sup> |            |                   | 69.1 | 58.8 | 60.9              | 51.4 | 60.5 | 64.8 | 59.9 | 56.0 |

\*Organic substrates: B1 – Peat MKS 1; B2 – Peat MKS 3; Mineral substrates: B3 – Rendzina; B4 – Rendzina + sand; B5 – Dystric cambisol; B6 – Dystric cambisol+sand; B7 – Eutric cambisol; B8 – Eutric cambisol+sand.
